# Supplementary figures and images for: Ethnomedicinal and Ethnobotanical Survey in the Aosta Valley Side of the Gran Paradiso National Park (Western Alps, Italy)
Source: MDPI journal article supplement (doi:10.3390/plants11020170), 2022-01-09

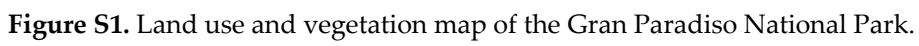

Supplement: s1 [file s1]
